# Supplementary material for: Fasting inhibits colorectal cancer growth by reducing M2 polarization of tumor-associated macrophages
Source: PubMed Central journal article supplement (PMC5650369; doi:10.18632/oncotarget.20301), 2017-08-16
Supplement: oncotarget-08-74649-s001.pdf [file oncotarget-08-74649-s001.pdf]

## Fasting inhibits colorectal cancer growth by reducing M2 polarization of tumor-associated macrophages

### SUPPLEMENTARY MATERIALS

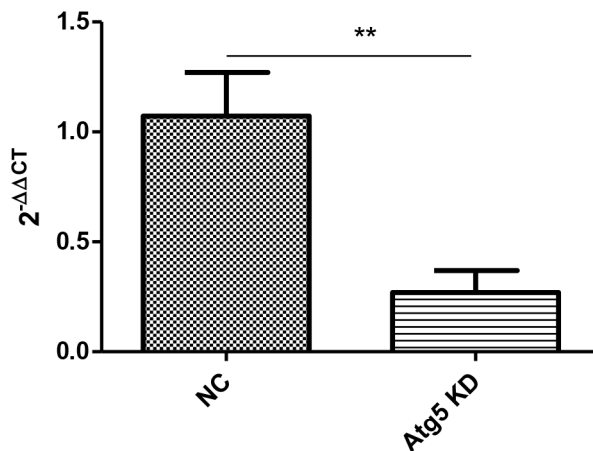

**Supplementary Figure 1:** CT26 cells were stably transfected with shAtg5(Atg5 KD) or shNC (NC). The Atg5 mRNA was determined by qPCR. \*\*P<0.01.

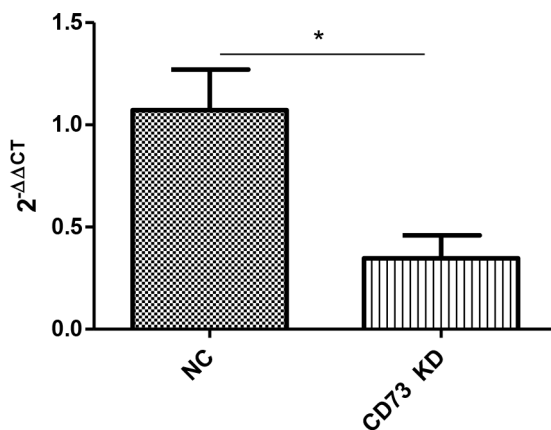

**Supplementary Figure 2:** CT26 cells were stably transfected with shCD73 (CD73 KD) or shNC (NC). The CD73 mRNA was determined by qPCR. \*P<0.05.

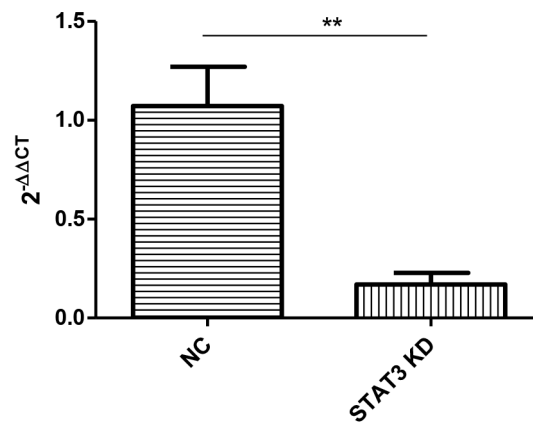

**Supplementary Figure 3:** RAW264.7 macrophages were stably transfected with shSTAT3 (STAT3 KD) or shNC (NC). The STAT3 mRNA was determined by qPCR. \*\* $P < 0.01$ .

**Supplementary Table 1: Primers used in this study**

| Gene name   | Primer sequence (5' to 3') |
|-------------|----------------------------|
| mus-ATG5-F  | ACCTTCTACACTGTCCATCCAA     |
| mus-ATG5-R  | GCTCCGTCGTGGTCTGATAT       |
| mus-STAT3-F | GCGGAGAAGCATTGTGAGTGA      |
| mus-STAT3-R | AGACGGTCCAGGCAGATGTT       |
| mus-CD73-F  | CTAGAGCAGACCAGCGATGAC      |
| mus-CD73-R  | CAGTCCTTCCACACCGTTATCA     |
| mus-GAPDH-F | TGGTGAAGGTCGGTGTGAAC       |
| mus-GAPDH-R | CGTGAGTGGAGTCATACTGGAA     |
